# Supplementary material
Source: publisher figshare collection journal article supplement (https://acs.figshare.com/ndownloader/files/14116403)

# Supporting Information

## Polymer-assisted Synthesis of Single and Fused Diketomorpholines

Petra Králová<sup>1</sup>, Sandra Benická<sup>1</sup> and Miroslav Sural<sup>2\*</sup>

<sup>1</sup> Department of Organic Chemistry, Faculty of Science, Palacký University, 771 46 Olomouc, Czech Republic

<sup>2</sup> Institute of Molecular and Translational Medicine, Faculty of Medicine and Dentistry, Palacký University,  
Hněvotínská 5, 779 00 Olomouc, Czech Republic

\*Corresponding author. E-mail: [miroslav.sural@upol.cz](mailto:miroslav.sural@upol.cz)

### Content

|                                         |   |
|-----------------------------------------|---|
| General Information .....               | 2 |
| Experimental Procedures .....           | 3 |
| Analytical Data of Final Compounds..... | 5 |

## General Information

Solvents and chemicals were purchased from Sigma-Aldrich (Milwaukee, WI, [www.sigmaaldrich.com](http://www.sigmaaldrich.com)) and Acros (Geel, Belgium, [www.across.cz](http://www.across.cz)). The Wang resin (100-200 mesh, 1% DVB, 0.9 mmol/g) was obtained from AAPPTec (Louisville, KY, [www.aapptec.com](http://www.aapptec.com)).

The synthesis was carried out in plastic reaction vessels (syringes, each equipped with a porous disk) using a manually operated synthesizer (Torviq, Niles, MI, [www.torviq.com](http://www.torviq.com)). All reactions were carried out at ambient temperature (25 °C) unless stated otherwise. The volume of wash solvent was 10 mL per 1 g of resin. For washing, resin slurry was shaken with the fresh solvent for at least 1 min before changing the solvent. Resin-bound intermediates were dried by a stream of nitrogen for prolonged storage and/or quantitative analysis. For the LC/MS analysis, a sample of resin (~5 mg) was treated with TFA in DCM, the cleavage cocktail was evaporated under a stream of nitrogen, and cleaved compounds extracted into MeCN (1 mL).

The LC/MS analyses were carried out on UHPLC-MS system consisting of UHPLC chromatograph Acquity with photodiode array detector and single quadrupole mass spectrometer (Waters), using X-Select C18 column at 30 °C and flow rate of 600  $\mu$ L/min. The mobile phase was (A) 10 mM ammonium acetate in H<sub>2</sub>O, and (B) MeCN, linearly programmed from 20% to 80% B over 2.5 min, kept for 1.5 min. The column was re-equilibrated with 20% of solution B for 1 min. The ESI source operated at discharge current of 5  $\mu$ A, vaporizer temperature of 350 °C and capillary temperature of 200 °C.

Purification was carried out on C18 reverse phase column (YMC Pack ODS-A, 20  $\times$  100 mm, 5  $\mu$ m particles), the gradient was formed from 10 mM aqueous ammonium acetate and MeCN, flow rate 15 mL/min.

For lyophilization of residual solvents (H<sub>2</sub>O, ammonium acetate buffer, DMSO) the ScanVac Coolsafe 110-4 working at -110 °C was used.

All 1D and 2D NMR experiments were performed with using ECA400II or ECX500 spectrometer (JEOL RESONANCE, Tokyo, Japan) at magnetic field strength of 9.39 T or 11.75 T corresponding to <sup>1</sup>H and <sup>13</sup>C resonance frequencies of 399.78 MHz or 500.16 MHz and 100.53 MHz or 125.77 MHz at 27 °C. Chemical shifts ( $\delta$ ) are reported in parts per million (ppm) and coupling constants (*J*) are reported in Hertz (Hz). The signal of MeCN-*d*<sub>3</sub> was set at 1.94 ppm in <sup>1</sup>H NMR spectra and at 118.26 ppm in <sup>13</sup>C NMR spectra. The signal of MeOH-*d*<sub>4</sub> was set at 3.31 ppm in <sup>1</sup>H NMR spectra and at 49.15 ppm in <sup>13</sup>C NMR spectra.

HRMS analysis was performed using LC-MS (Dionex Ultimate 3000) with Orbitrap Elite high-resolution mass spectrometer (Thermo Exactive plus, MA, USA) operating at positive full scan mode (120 000 FWHM) in the range of 100-1000 *m/z*. The settings for electrospray

ionization were as follows: oven temperature of 150 °C and the source voltage of 3.6 kV. The acquired data were internally calibrated with phthalate as a contaminant in MeOH ( $m/z$  297.15909). Samples were diluted to a final concentration of 0.1 mg/mL in MeCN. Before HPLC separation (column Phenomenex Gemini, 50 × 2.00 mm, 3  $\mu$ m particles, C18), the samples were injected using direct infusion into the mass spectrometer using autosampler. The mobile phase was isocratic MeCN/10 mM ammonium acetate (80:20) and flow 0.3 mL/min.

The supercritical fluid chromatography system UPC<sup>2</sup> (Waters, Milford, MA, USA) utilized two columns (100 × 4.6 mm) with different stationary phases with particle size 3  $\mu$ m CHIRALPAK® IC-3 (Daicel, Illkirch Cedex, France). Column IC-3 was used for all analyses. Isocratic elution was performed using CO<sub>2</sub> (>99,995%, SIAD, Czech Republic) with 25% MeOH, 1% H<sub>2</sub>O, 0.1% TFA and 0.1% DEA for purified compounds **4**{1,1}, **5**{*R*<sup>1</sup>,*R*<sup>2</sup>} and **5<sup>R</sup>**{1,2}. Second, with 20% MeOH, 1% H<sub>2</sub>O and 0.1% TFA for purified compound **7**{1,1} and with 10% MeOH, 1% H<sub>2</sub>O, 0.1% TFA and 0.1% DEA for reaction mixture **5**{1,2} and **5<sup>R</sup>**{1,2} originating from reaction kinetic. Flow rate was set at 2.2 mL/min, the temperature at 38 °C, ABPR 2000 psi, the temperature of autosampler was set to 10 °C. All samples were dissolved in MeCN (1 mL). Injected volume was 2  $\mu$ L.

## Experimental Procedures

Synthesis of  $\alpha$ -acylamino ketones **1**{*R*<sup>1</sup>} was performed according to previously reported procedure (Králová, P.; Fülöpová, V.; Maloň, M.; Volná, T.; Popa, I.; Soral, M. Stereoselective Polymer-Supported Synthesis of Morpholine- and Thiomorpholine-3-Carboxylic Acid Derivatives. *ACS Comb. Sci.* **2017**, 19 (3), 173–180).

### 1. Acylation: **2**{*R*<sup>1</sup>,*R*<sup>2</sup>}

Carboxylic acids: 2-iodoacetic acid (560 mg, 3.0 mmol), (S)-(-)- $\alpha$ -bromopropionic acid (459 mg, 3.0 mmol) or  $\alpha$ -bromophenylacetic acid (645 mg, 3.0 mmol) was dissolved in DCM (10 mL) and DIC (232  $\mu$ L, 1.5 mmol) was added. The reaction mixture was shaken for 30 min at room temperature, the precipitated diisopropylurea was filtered and the remaining solution was added to resin **1**{*R*<sup>1</sup>} (1 g). After shaking for 24 h at room temperature the resulting resins **2**{*R*<sup>1</sup>,*R*<sup>2</sup>} were washed three times with DCM, DMF and DCM.

Acyl bromides: Solution of 2-bromopropionyl bromide (310  $\mu$ L, 1.5 mmol) and DIEA (350  $\mu$ L, 1.5 mmol) in DCM (10 mL) was added to the resin **1**{*R*<sup>1</sup>} (1 g) and shaken for 24 h at room temperature. The resulting resin **2**{*R*<sup>1</sup>,2} was washed three times with DCM, DMF and DCM.

## 2. Cyclization to oxazines: **3**{*R*<sup>1</sup>,*R*<sup>2</sup>}

The resin **2**{*R*<sup>1</sup>,*R*<sup>2</sup>} (500 mg) was washed three times with DCM and solution of trifluoroacetic acid (TFA) in DCM (50%, 5 mL) was added. The suspension was shaken for 1 h (or 4 h for derivatives **2**{*R*<sup>1</sup>,3}) at room temperature. The cleavage cocktail was isolated, and the resin was further washed three times with the fresh cleavage cocktail (5 mL). The combined washes were evaporated using a stream of nitrogen.

**Table 1.** Crude purities of *N*-acyl-3,4-dihydro-2*H*-1,4-oxazine-3-carboxylic acids **3**{*R*<sup>1</sup>,*R*<sup>2</sup>}

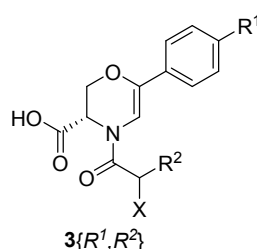

| cmpd                        | R <sup>1</sup> | R <sup>2</sup> | crude purity [%] <sup>a</sup> |
|-----------------------------|----------------|----------------|-------------------------------|
| <b>3</b> {1,1}              | H              | H              | 97                            |
| <b>3</b> {1,2}              | H              | Me             | 94                            |
| <b>3</b> <sup>R</sup> {1,2} | H              | Me             | 96                            |
| <b>3</b> {1,3}              | H              | Ph             | 91                            |
| <b>3</b> {2,2}              | MeO            | Me             | 94                            |
| <b>3</b> {2,3}              | MeO            | Ph             | 56                            |
| <b>3</b> {3,1}              | Br             | H              | 94                            |
| <b>3</b> {3,2}              | Br             | Me             | 85                            |
| <b>3</b> {3,3}              | Br             | Ph             | 79                            |
| <b>3</b> {1,1}              | H              | H              | 90                            |

<sup>a</sup>Determined from the HPLC-UV traces (205-400 nm).

## 3. Cyclization to diketomorpholines: **4**{*R*<sup>1</sup>,*R*<sup>2</sup>}, **5**{*R*<sup>1</sup>,*R*<sup>2</sup>}

To the crude intermediates **3**{*R*<sup>1</sup>,*R*<sup>2</sup>} (cleaved from 500 mg resin), a solution of DIEA (435  $\mu$ L, 2.5 mmol) in DMSO was added. The reaction mixture was stirred either for 20 min at room temperature (derivatives **4**{*R*<sup>1</sup>,1}), for 20 h at room temperature (derivatives **5**{*R*<sup>1</sup>,1} and **5**{*R*<sup>1</sup>,3}) or for 1 h at 80 °C (derivatives **5**{*R*<sup>1</sup>,2}). The reaction mixture was freeze-dried and residual material was purified by semi-preparative HPLC chromatography.

## 4. TES reduction: **6**{*R*<sup>1</sup>,*R*<sup>2</sup>} and **7**{*R*<sup>1</sup>,*R*<sup>2</sup>}

To the crude intermediates **4**{*R*<sup>1</sup>,*R*<sup>2</sup>} and **5**{*R*<sup>1</sup>,*R*<sup>2</sup>} a solution of TFA/TES/DCM (2:1:2, 3.75 mL) was added and the reaction mixture was stirred for 8 h at room temperature. Solvents were

evaporated using a stream of nitrogen and the residual material was purified by semipreparative HPLC chromatography.

### Analytical Data of Final Compounds

#### SFC chromatogram of crude intermediate 4{1,1}

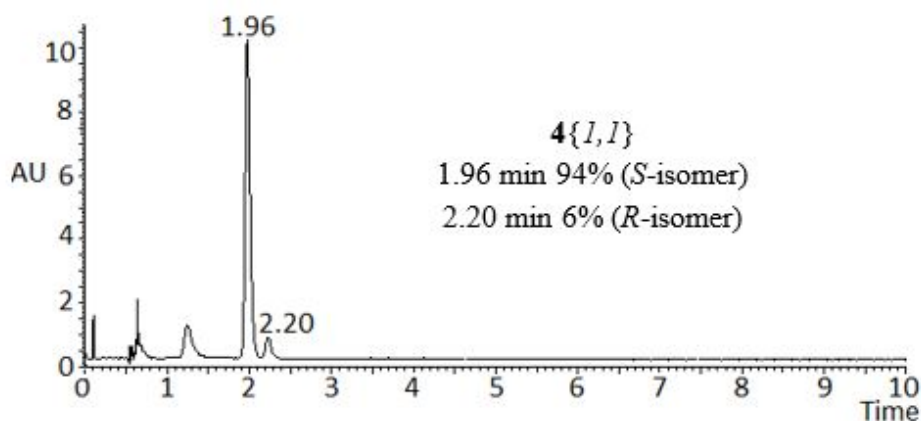

**General method for calculation of yields using  $^1\text{H}$  NMR:**  $^1\text{H}$  NMR spectra of external standard at three different concentration were measured. In each spectrum, solvent signal was integrated followed by the integration of selected  $\text{H}^{\text{Ar}}$  signal of external standard. Ratios of solvent/standard signal areas along with known quantity of standard were used to construct a calibration curve. Then,  $^1\text{H}$  NMR spectra of studied sample was measured and the ratio of solvent/sample (selected  $\text{H}^{\text{Ar}}$  signal) areas was determined. Using the calibration curve, the quantity of compound in a sample was calculated.

**(9a*S*)-7-phenyl-9,9a-dihydro-1*H*-[1,4]oxazino[3,4-*c*][1,4]oxazine-1,4-(3*H*)-dione 4{1,1}**

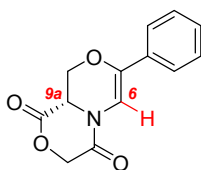

Crème amorphous solid, 11.6 mg (45%, 0.047 mmol). Cleaved from 347 mg of resin **2{1,1}** (0.37 mmol/g, 0.128 mmol of substrate). HPLC purity 98%.  $^1\text{H}$  NMR (500 MHz,  $\text{MeCN-}d_3$ ): dissolving the sample led to partial conversion to **5{1,1}** (17%, see the zoomed proton spectrum below), the following NMR data were extracted for **4{1,1}**:  $\delta$  = 7.56-7.58 (m, 2H), 7.40-7.32 (m, 3H), 7.19 (s, 1H), 5.00 (d,  $J$  = 15.9 Hz, 1H), 4.84 (dd,  $J$  = 11.1, 4.0 Hz, 1H), 4.70 (d,  $J$  = 15.9 Hz, 1H), 4.68 (dd,  $J$  = 9.6, 4.0 Hz, 1H), 4.12 (dd,  $J$  = 11.1, 9.6 Hz, 1H).  $^{13}\text{C}$  NMR (126 MHz,  $\text{MeCN-}d_3$ ):  $\delta$  = 165.08, 159.87, 142.24, 133.96, 129.52, 129.44, 124.86, 100.00, 68.18, 66.00, 52.17. HRMS (ESI-TOF, pos.):  $m/z$  calcd for  $\text{C}_{13}\text{H}_{12}\text{NO}_4$   $[\text{M}+\text{H}]^+$  246.0761, found 246.0760.

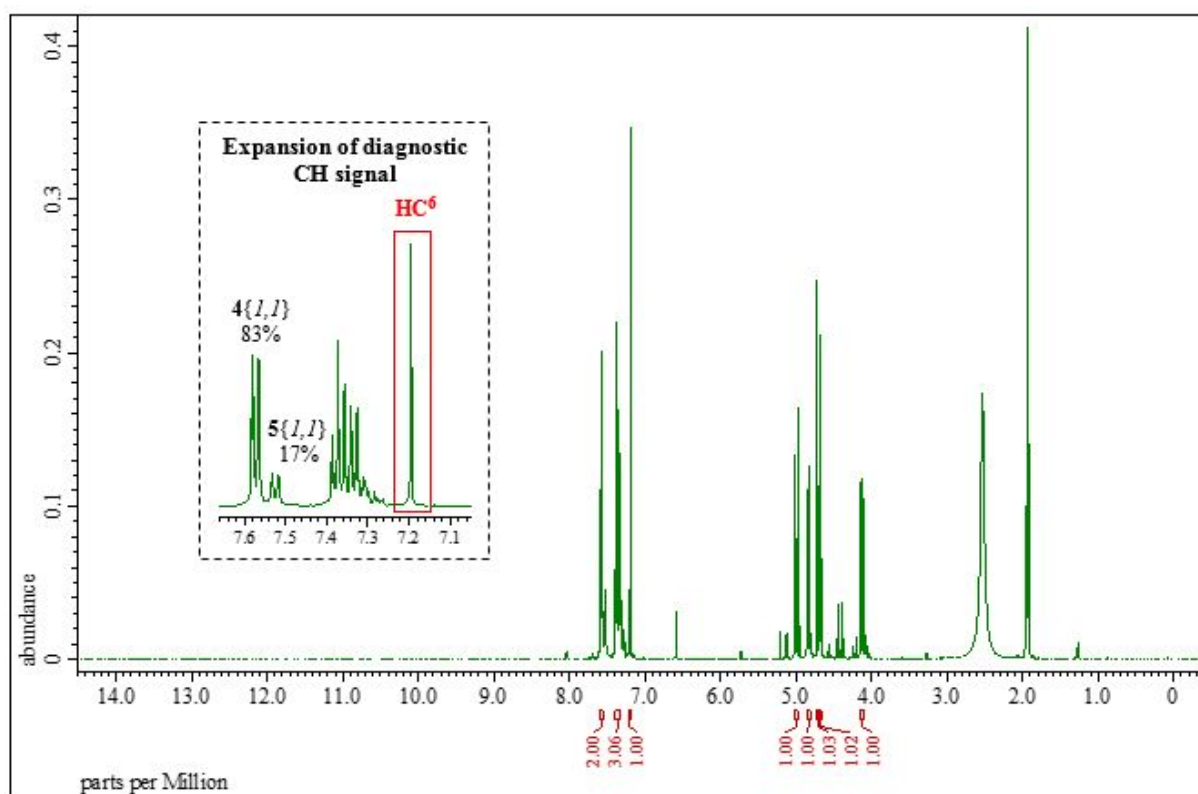

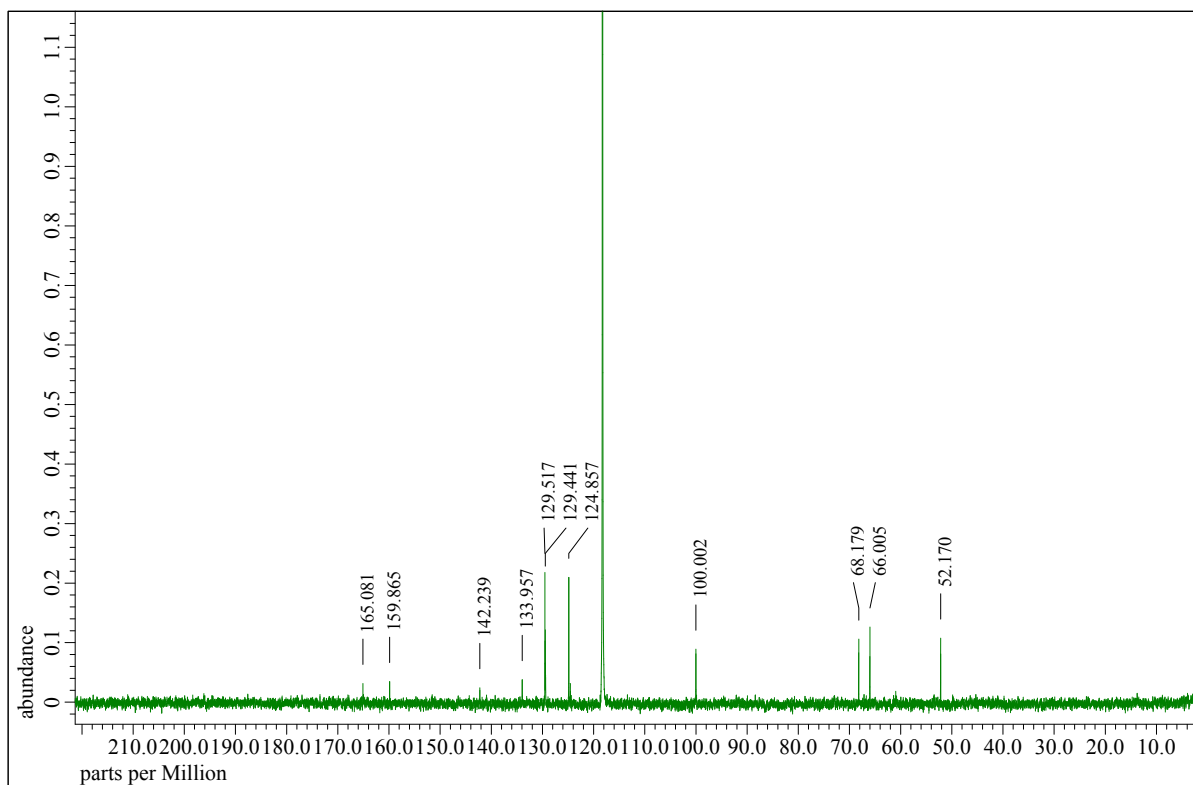

### 3-methylene-4-(2-oxo-2-phenylethyl)morpholine-2,5-dione **5{1,1}**

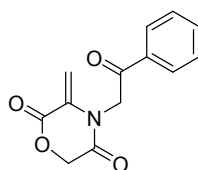

Crepe amorphous solid, 18.3 mg (46%, 0.075 mmol). Cleaved from 415 mg of resin **2{1,1}** (0.39 mmol/g, 0.162 mmol of substrate). HPLC purity 99%.  $^1\text{H}$  NMR (500 MHz,  $\text{MeCN-}d_3$ ):  $\delta$  = 8.02-8.05 (m, 2H), 7.67-7.71 (m, 1H), 7.54-7.58 (m, 2H), 5.73 (d,  $J$  = 2.4 Hz, 1H), 5.20 (s, 2H), 4.99 (d,  $J$  = 2.4 Hz, 1H), 4.94 (s, 2H).  $^{13}\text{C}$  NMR (126 MHz,  $\text{MeCN-}d_3$ ):  $\delta$  = 192.57, 163.27, 160.13, 135.60, 135.11, 134.32, 129.90, 129.08, 107.38, 67.88, 50.75. HRMS (ESI-TOF, pos.):  $m/z$  calcd for  $\text{C}_{13}\text{H}_{12}\text{NO}_4$   $[\text{M}+\text{H}]^+$  246.0761, found 246.0761.

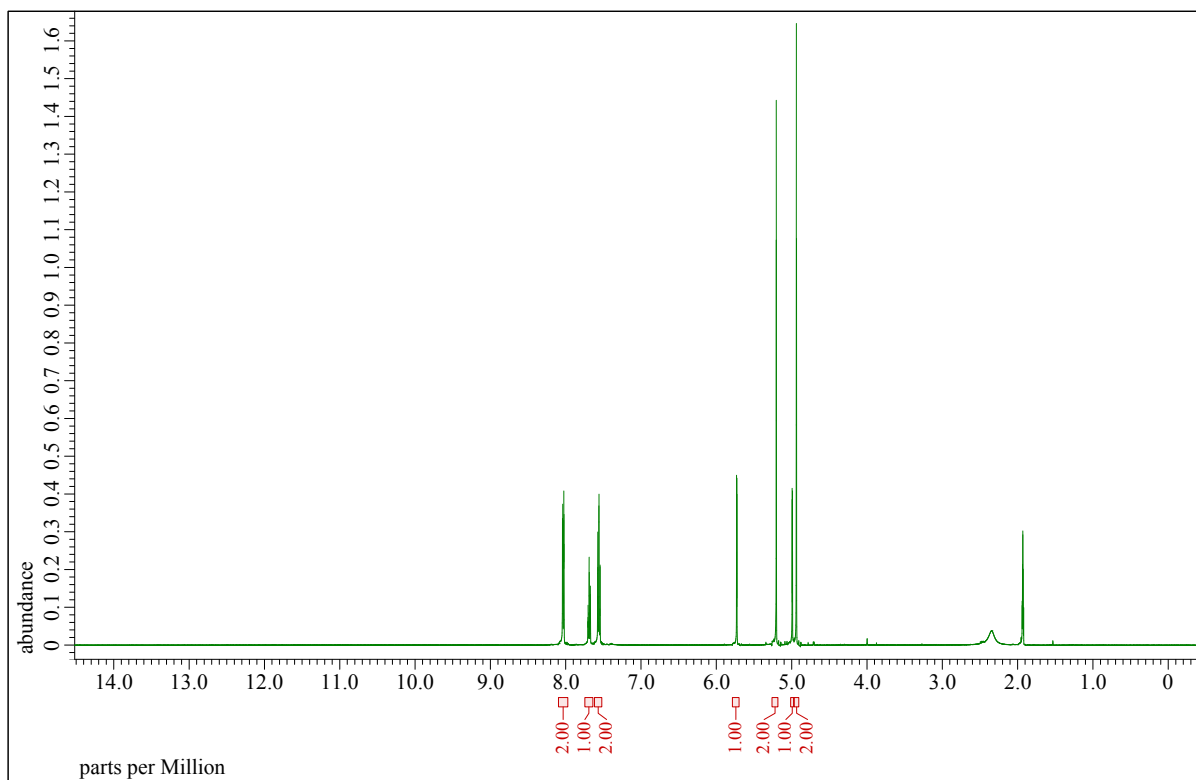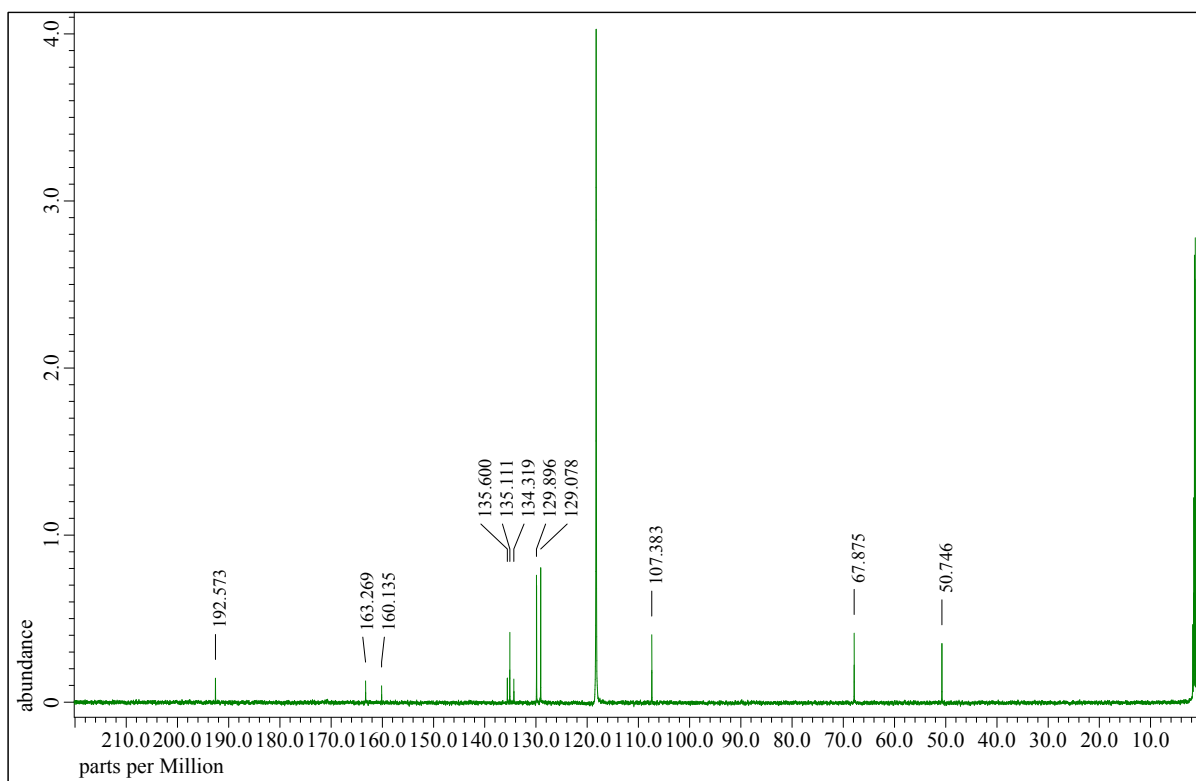



**6-methyl-3-methylene-4-(2-oxo-2-phenylethyl)morpholine-2,5-dione **5{1,2}****

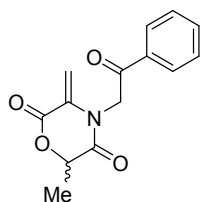

SFC: Mixture of enantiomers in ratio 90:10 (*R*:*S*). Creme amorphous solid, 21.5 mg (48%, 0.083 mmol). Cleaved from 473 mg of resin **2{1,2}** (0.37 mmol/g, 0.175 mmol of substrate). HPLC purity 99%.  $^1\text{H}$  NMR (400 MHz,  $\text{MeOH-}d_4$ ):  $\delta$  = 8.05-8.07 (m, 2H), 7.66-7.68 (m, 1H), 7.54-7.58 (m, 2H), 5.79 (d,  $J$  = 2.3 Hz, 1H), 5.34 (d,  $J$  = 18.0 Hz, 1H), 5.26 (d,  $J$  = 18.0 Hz, 1H), 5.15 (q,  $J$  = 7.0 Hz, 1H), 5.06 (d,  $J$  = 2.3 Hz, 1H), 1.64 (dd,  $J$  = 7.0, 0.6 Hz, 3H).  $^{13}\text{C}$  NMR (101 MHz,  $\text{MeOH-}d_4$ ):  $\delta$  = 193.36, 167.35, 161.37, 136.07, 135.45, 135.25, 130.21, 129.39, 107.82, 76.02, 51.32, 18.91. HRMS (ESI-TOF, pos.):  $m/z$  calcd for  $\text{C}_{14}\text{H}_{14}\text{NO}_4$   $[\text{M}+\text{H}]^+$  260.0917, found 260.0918.

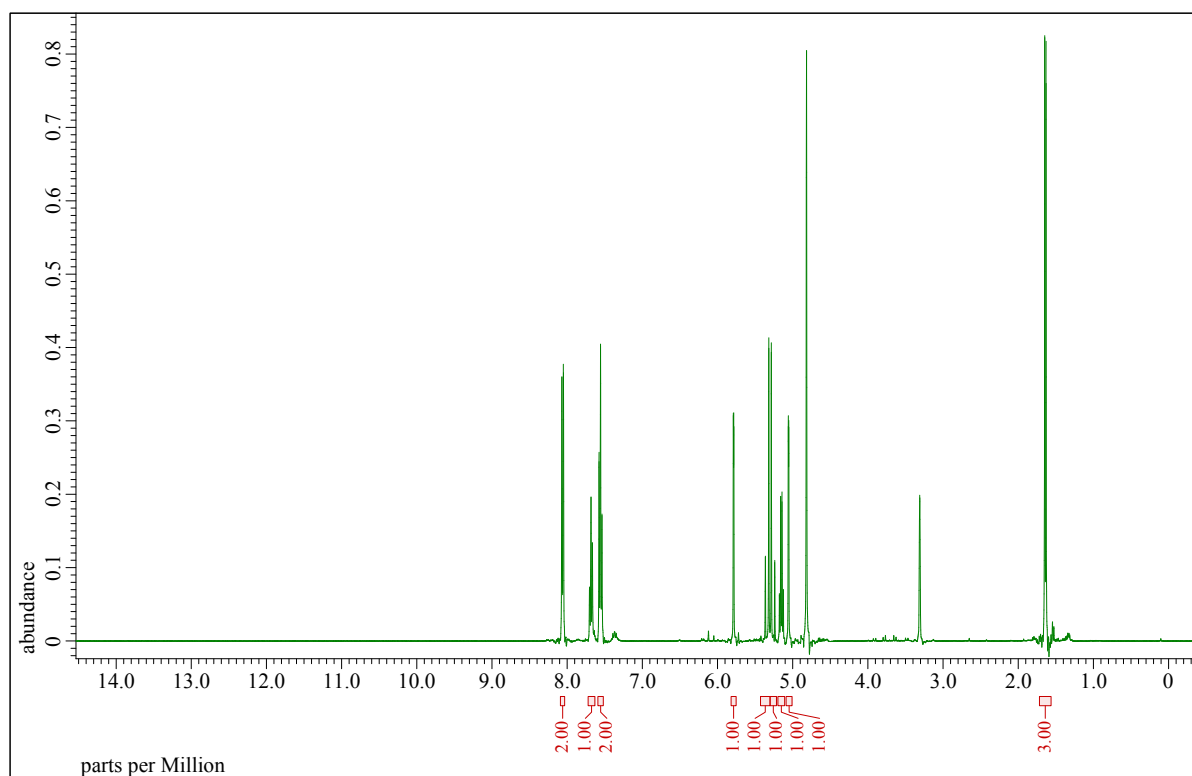

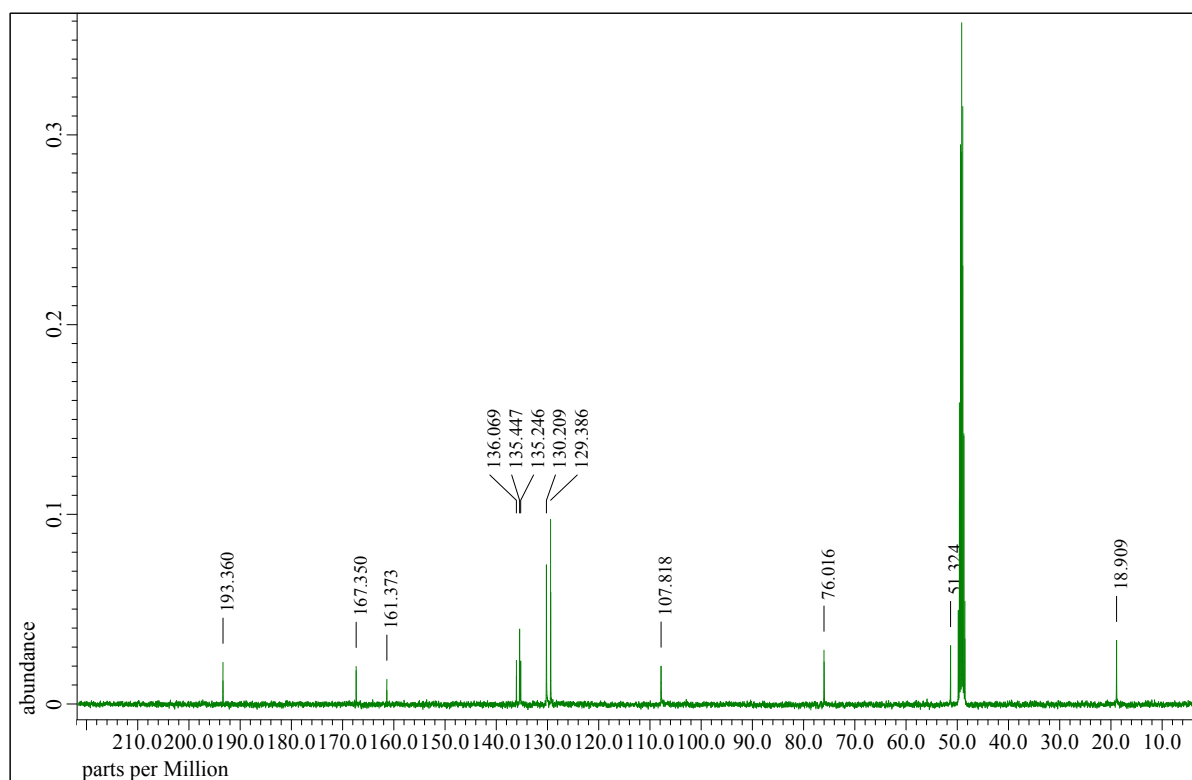

**(6R)-methyl-3-methylene-4-(2-oxo-2-phenylethyl)morpholine-2,5-dione 5<sup>R</sup>{1,2}**

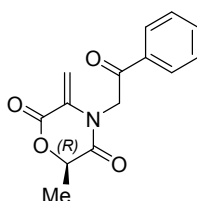

SFC: Mixture of enantiomers in ratio 85:15 (*R*:*S*). Creme amorphous solid, 11.6 mg (24%, 0.045 mmol). Cleaved from 464 mg of resin **2<sup>S</sup>**{1,2} (0.40 mmol/g, 0.186 mmol of substrate) prepared from (*S*)-(-)-2-bromopropionic. HPLC purity 99%. <sup>1</sup>H NMR (400 MHz, MeOH-*d*<sub>4</sub>):  $\delta$  = 8.06-8.08 (m, 2H), 7.67-7.71 (m, 1H), 7.55-7.58 (m, 2H), 5.79 (d, *J* = 2.3 Hz, 1H), 5.34 (d, *J* = 18.0 Hz, 1H), 5.26 (d, *J* = 18.0 Hz, 1H), 5.16 (q, *J* = 7.0 Hz, 1H), 5.06 (d, *J* = 2.3 Hz, 1H), 1.64 (dd, *J* = 7.0, 0.6 Hz, 3H). <sup>13</sup>C NMR (101 MHz, MeOH-*d*<sub>4</sub>):  $\delta$  = 193.37, 167.38, 161.38, 136.09, 135.45, 135.27, 130.21, 129.39, 107.81, 76.03, 51.33, 18.91. HRMS (ESI-TOF, neg.): *m/z* calcd for C<sub>14</sub>H<sub>12</sub>NO<sub>4</sub> [M-H]<sup>-</sup> 258.0761, found 258.0758.

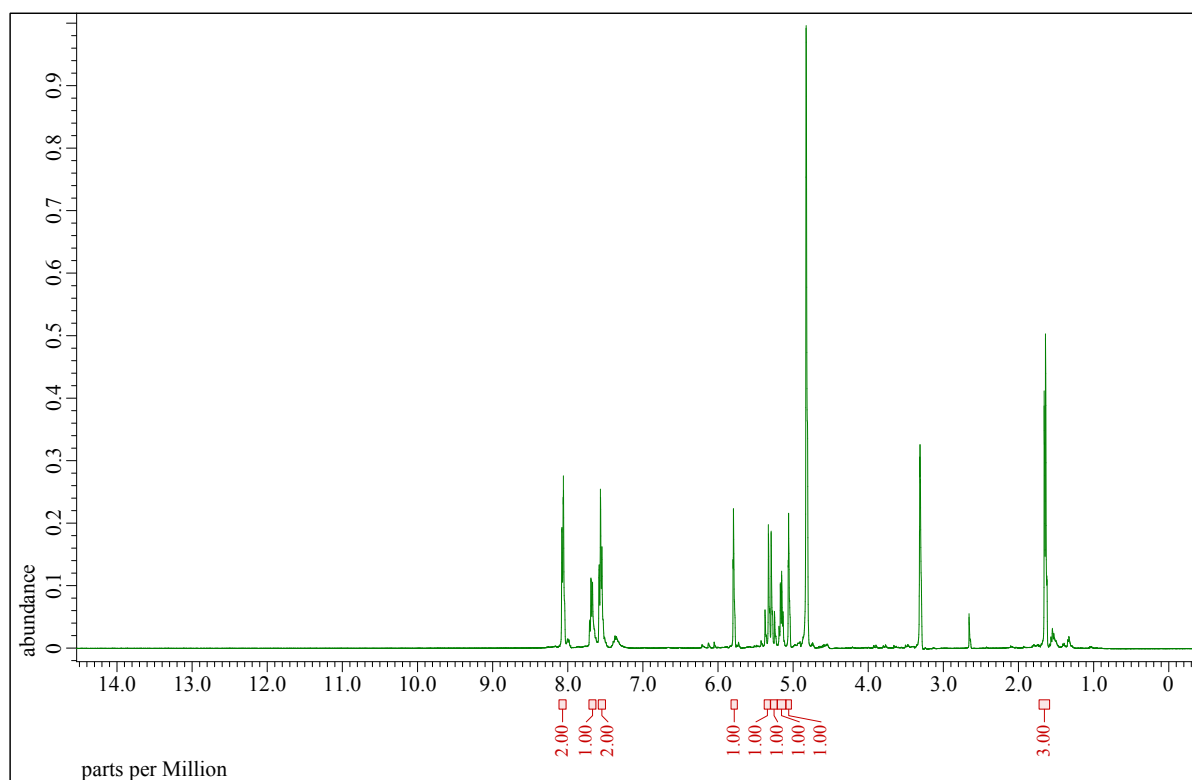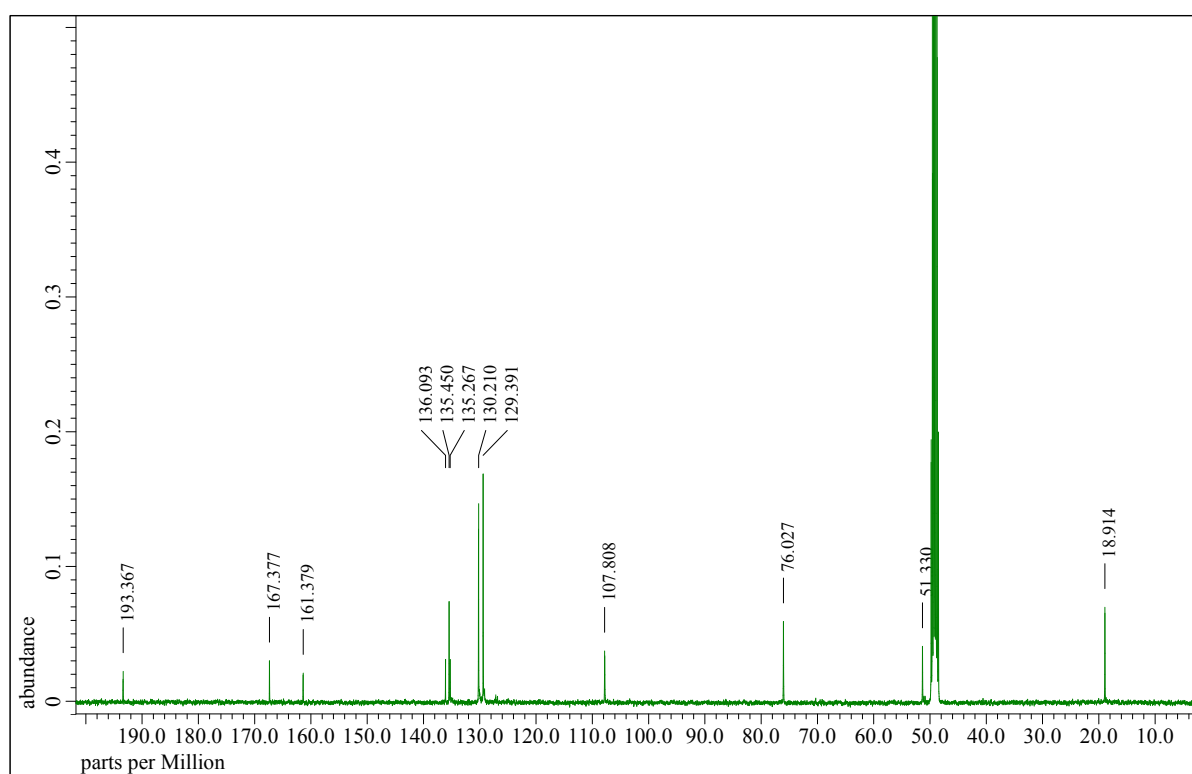

**3-methylene-4-(2-oxo-2-phenylethyl)-6-phenylmorpholine-2,5-dione **5{1,3}****

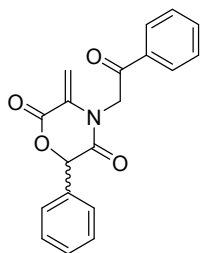

SFC: 100% *R*-isomer. Creme amorphous solid, 7.6 mg (27%, 0.024 mmol). Cleaved from 222 mg of resin **2{1,2}** (0.39 mmol/g, 0.087 mmol of substrate). HPLC purity 98%. <sup>1</sup>H NMR (500 MHz, MeCN-*d*<sub>3</sub>):  $\delta$  = 8.03-8.05 (m, 2H), 7.68-7.72 (m, 1H), 7.57-7.58 (m, 2H), 7.47-7.55 (m, 5H), 6.05 (s, 1H), 5.81 (d, *J* = 2.3 Hz, 1H), 5.45 (d, *J* = 18.0 Hz, 1H), 5.08 (d, *J* = 2.3 Hz, 1H), 5.06 (d, *J* = 18.0 Hz, 1H). <sup>13</sup>C NMR (126 MHz, MeCN-*d*<sub>3</sub>):  $\delta$  = 192.79, 164.26, 160.21, 136.31, 135.54, 135.19, 134.56, 130.59, 130.02, 129.92, 129.15, 128.33, 108.42, 80.65, 51.52. HRMS (ESI-TOF, neg.): *m/z* calcd for C<sub>19</sub>H<sub>14</sub>NO<sub>4</sub> [M-H]<sup>-</sup> 320.0917, found 320.0912.

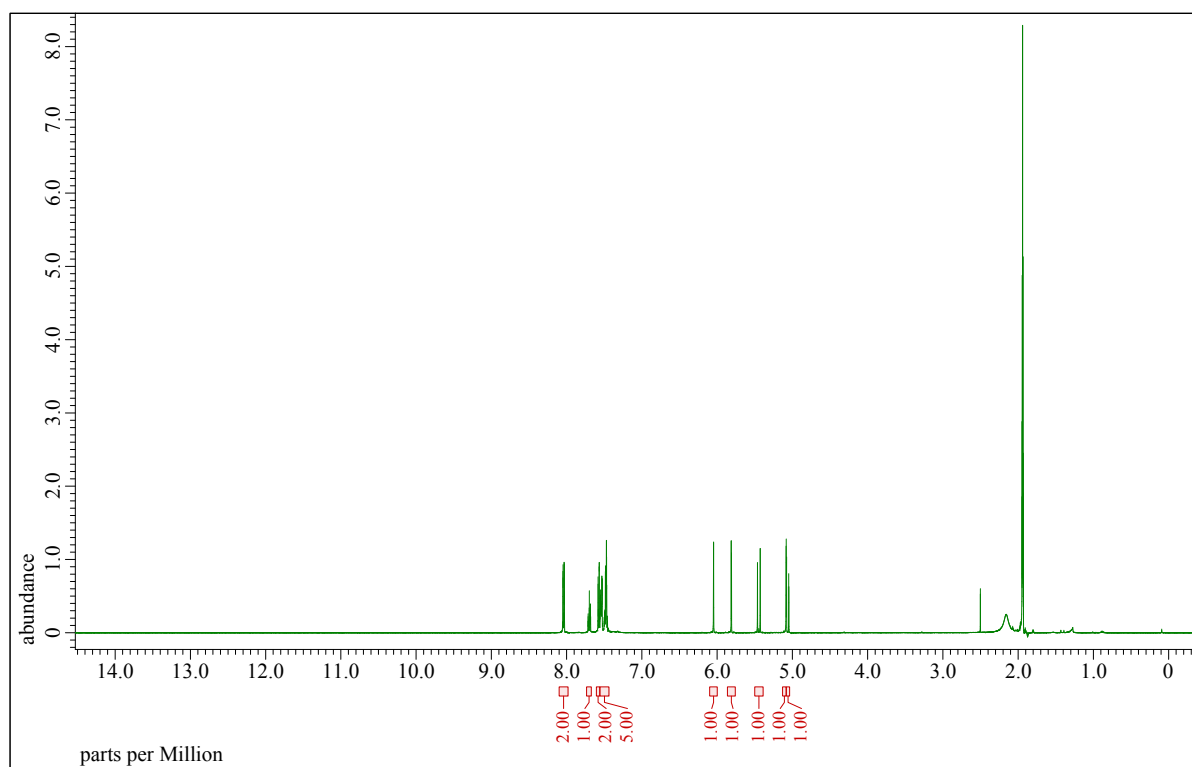

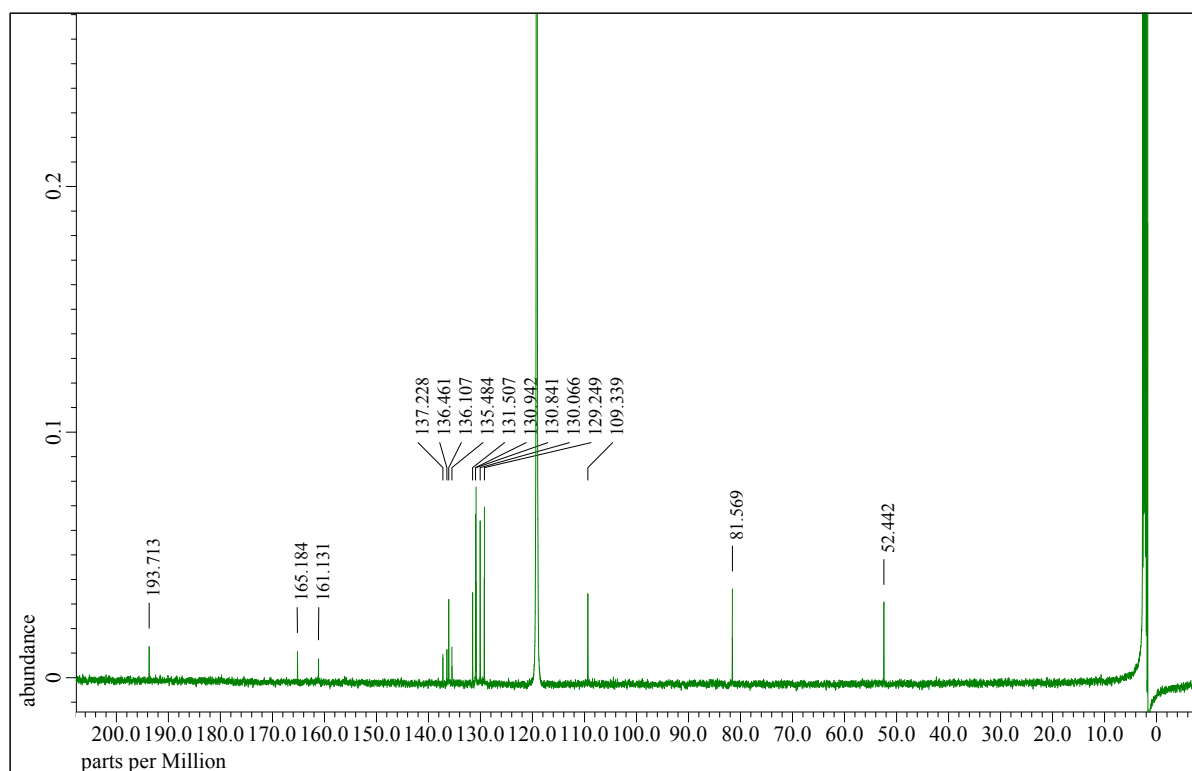

**4-(2-(4-methoxyphenyl)-2-oxoethyl)-6-methyl-3-methylenemorpholine-2,5-dione 5{2,2}**

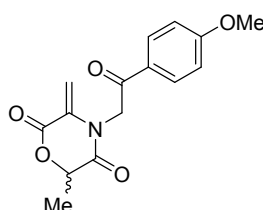

SFC: Mixture of enantiomers in ratio 91:9 (*R*:*S*). Yellow-brown amorphous solid, 15.4 mg (35%, 0.053 mmol). Cleaved from 411 mg of resin **2{2,2}** (0.37 mmol/g, 0.152 mmol of substrate). HPLC purity 99%.  $^1\text{H}$  NMR (400 MHz,  $\text{MeOH-}d_4$ ):  $\delta$  = 8.04 (br. d,  $J$  = 8.4 Hz, 2H), 7.06 (br. d,  $J$  = 8.4 Hz, 2H), 5.78 (s, 1H), 5.28 (d,  $J$  = 18.0 Hz, 1H), 5.21 (d,  $J$  = 18.0 Hz, 1H), 5.15 (q,  $J$  = 7.0 Hz, 1H), 5.02 (s, 1H), 3.90 (s, 3H), 1.64 (d,  $J$  = 7.0 Hz, 3H).  $^{13}\text{C}$  NMR (101 MHz,  $\text{MeOH-}d_4$ ):  $\delta$  = 191.80, 167.38, 166.18, 161.39, 135.31, 131.82, 128.90, 115.39, 107.74, 76.03, 56.31, 50.94, 18.92. HRMS (ESI-TOF, pos.):  $m/z$  calcd for  $\text{C}_{15}\text{H}_{16}\text{NO}_5$   $[\text{M}+\text{H}]^+$  290.1023, found 290.1020.

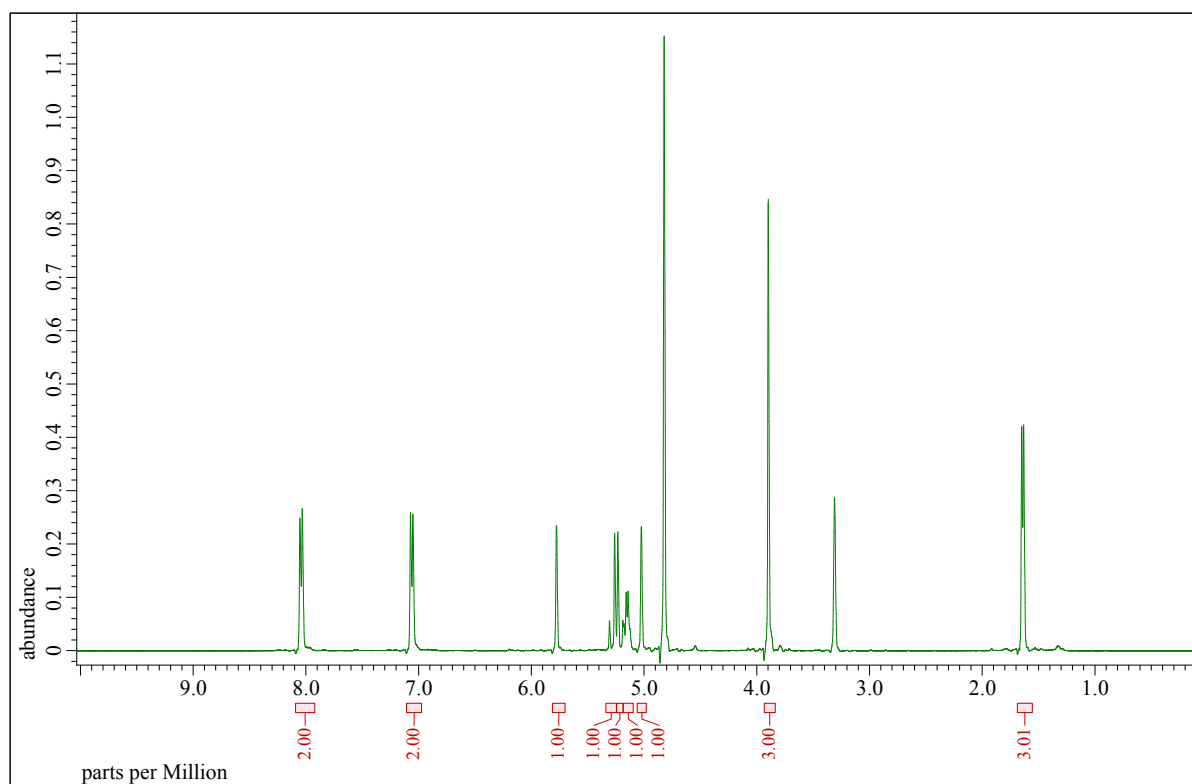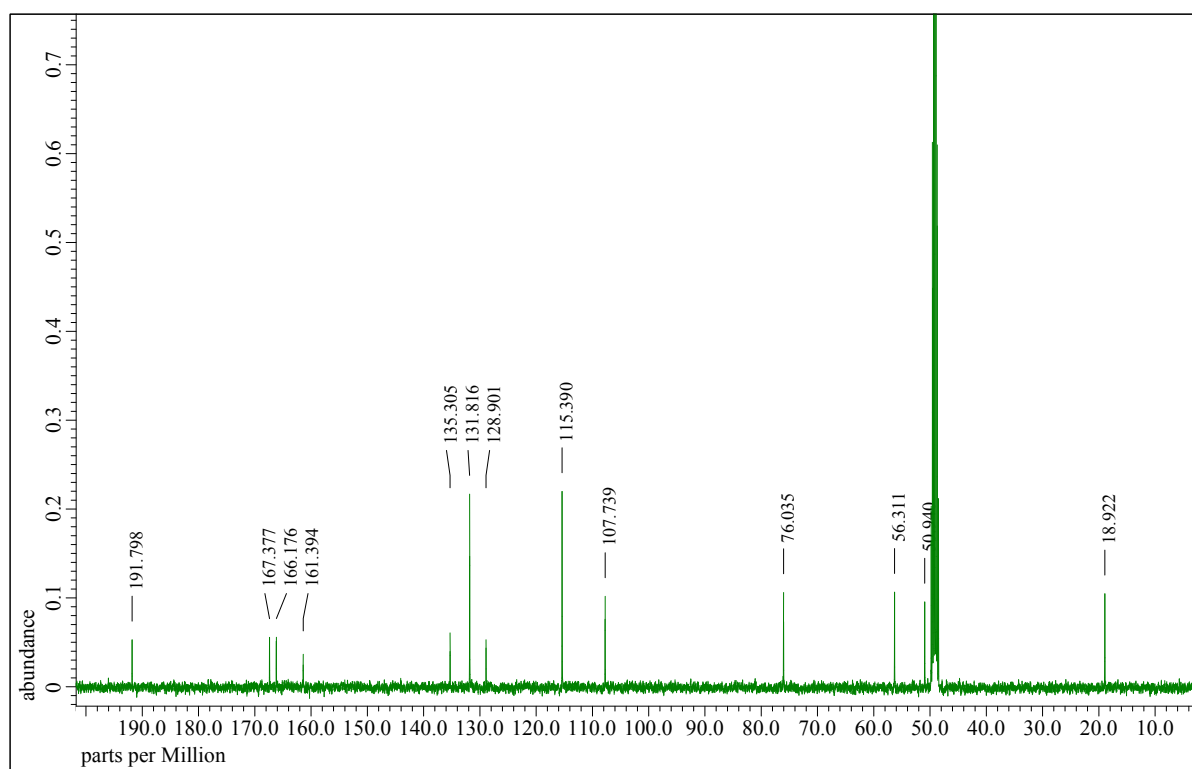

**4-(2-(4-methoxyphenyl)-2-oxoethyl)-3-methylene-6-phenylmorpholine-2,5-dione 5{2,3}**

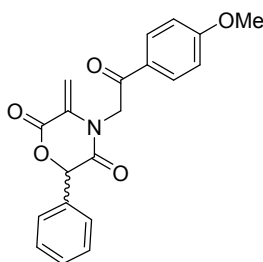

SFC: 100% *R*-isomer. Yellow-brown amorphous solid, 9.1 mg (14%, 0.026 mmol). Cleaved from 511 mg of resin **2{2,2}** (0.37 mmol/g, 0.189 mmol of substrate). HPLC purity 99%. <sup>1</sup>H NMR (400 MHz, MeCN-*d*<sub>3</sub>):  $\delta$  = 8.01 (br. d, *J* = 9.0 Hz, 2H), 7.46-7.53 (m, 5H), 7.05 (br. d, *J* = 9.0 Hz, 2H), 6.04 (s, 1H), 5.80 (d, *J* = 2.4 Hz, 1H), 5.40 (d, *J* = 17.9 Hz, 1H), 5.05 (d, *J* = 2.4 Hz, 1H), 5.00 (d, *J* = 17.9 Hz, 1H), 3.88 (s, 3H). <sup>13</sup>C NMR (101 MHz, MeCN-*d*<sub>3</sub>):  $\delta$  = 190.95, 165.38, 164.23, 160.23, 136.34, 134.61, 131.53, 130.57, 130.01, 128.45, 128.35, 115.08, 108.34, 80.66, 56.44, 51.15. HRMS (ESI-TOF, pos.): *m/z* calcd for C<sub>20</sub>H<sub>18</sub>NO<sub>5</sub> [M+H]<sup>+</sup> 352.1179, found 352.1180.

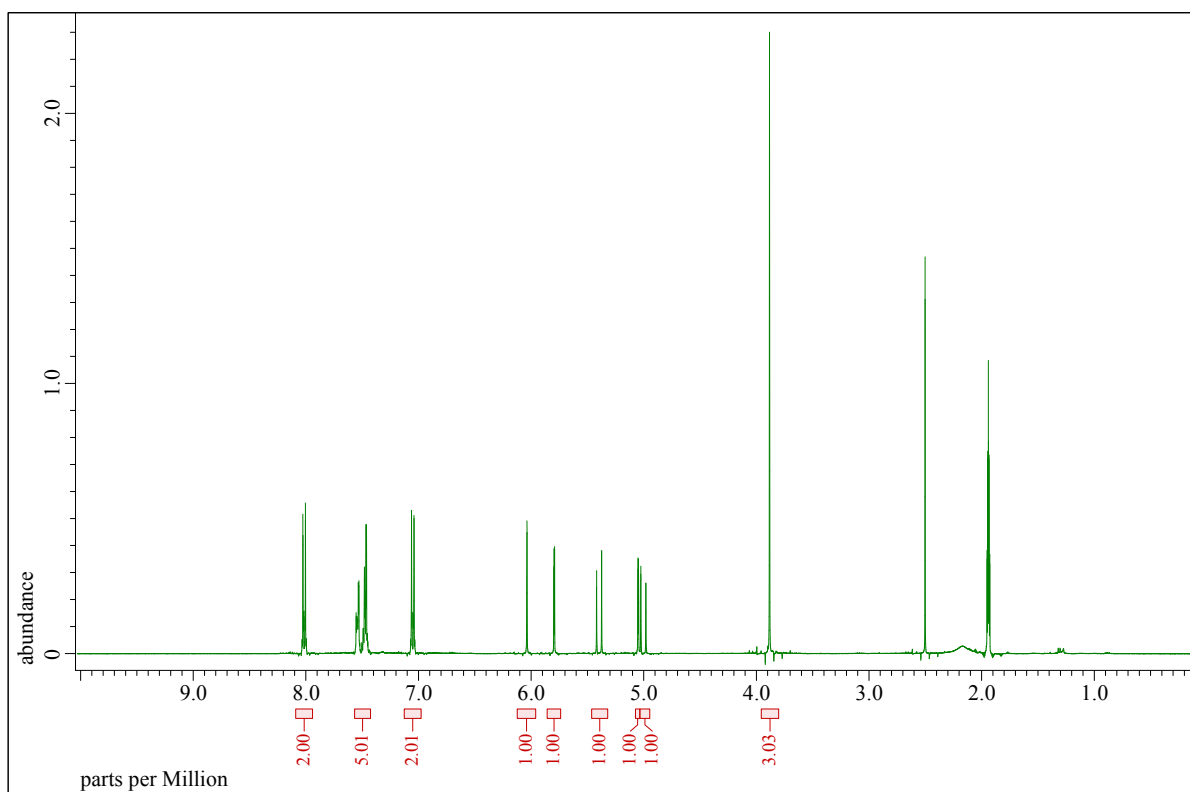

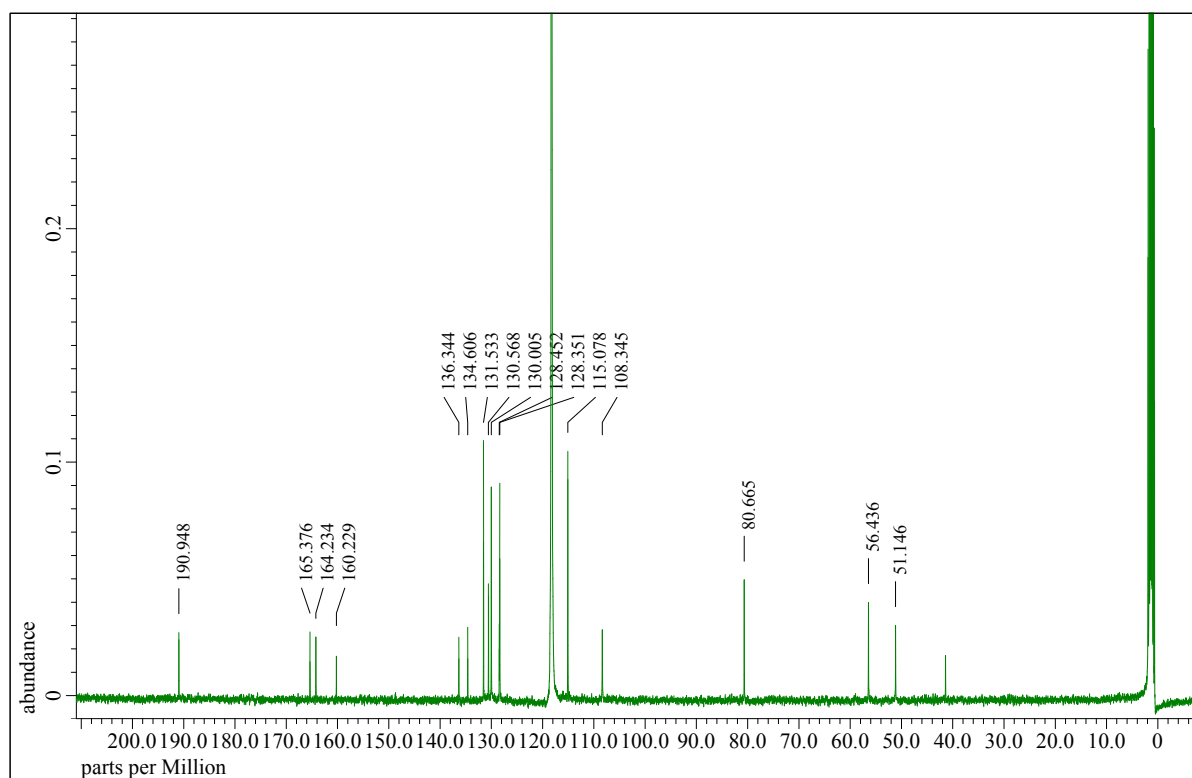

**4-(2-(4-bromophenyl)-2-oxoethyl)-3-methylenemorpholine-2,5-dione 5{3,1}**

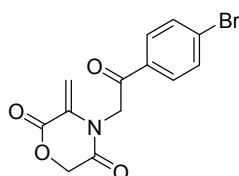

Crepe amorphous solid, 16.6 mg (30%, 0.052 mmol). Cleaved from 466 mg of resin **2{2,1}** (0.37 mmol/g, 0.172 mmol of substrate). HPLC purity 98%.  $^1\text{H}$  NMR (400 MHz,  $\text{MeCN-}d_3$ ):  $\delta$  = 7.94 (br. d,  $J$  = 8.6 Hz, 2H), 7.74 (br. d,  $J$  = 8.6 Hz, 2H), 5.74 (d,  $J$  = 2.4 Hz, 1H), 5.18 (s, 2H), 5.00 (d,  $J$  = 2.4 Hz, 1H), 4.94 (s, 2H).  $^{13}\text{C}$  NMR (101 MHz,  $\text{MeCN-}d_3$ ):  $\delta$  = 191.91, 163.28, 160.09, 134.54, 134.29, 133.09, 130.92, 129.60, 107.42, 67.87, 50.70. HRMS (ESI-TOF, neg.):  $m/z$  calcd for  $\text{C}_{13}\text{H}_9\text{BrNO}_4$   $[\text{M-H}]^-$  321.9709, found 321.9711.



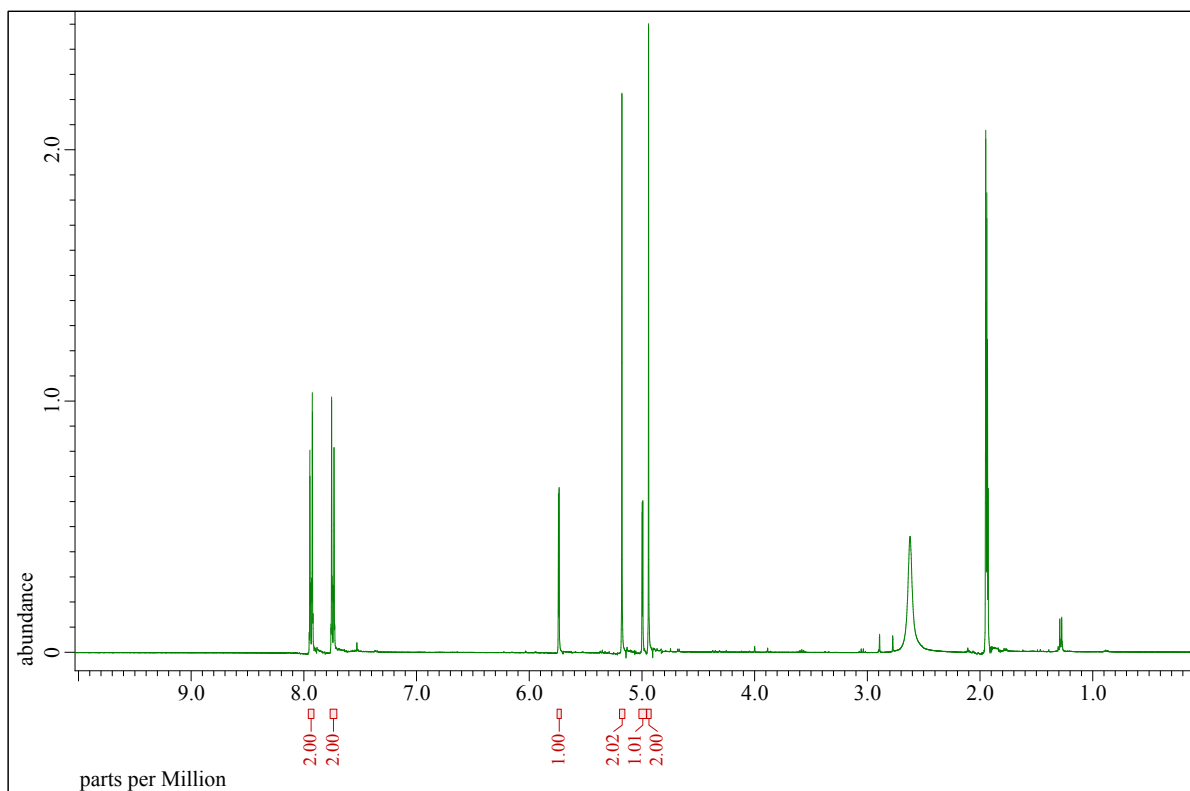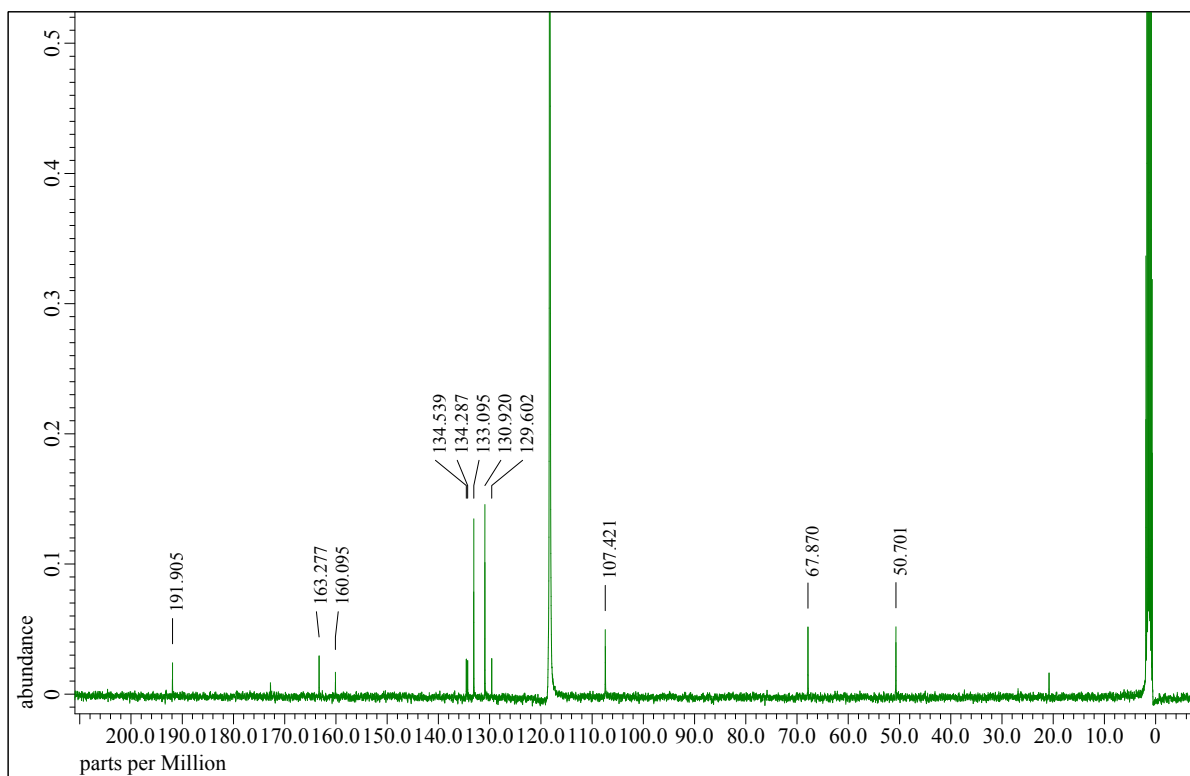

**4-(2-(4-bromophenyl)-2-oxoethyl)-6-methyl-3-methylenemorpholine-2,5-dione 5{3,2}**

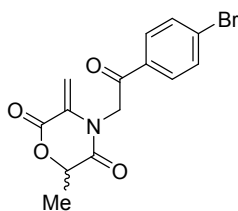

SFC: Mixture of enantiomers in ratio 87:13 (*R*:*S*). Creme amorphous solid, 9.1 mg (22%, 0.027 mmol). Cleaved from 339 mg of resin **2**{3,2} (0.37 mmol/g, 0.125 mmol of substrate). HPLC purity 96%.  $^1\text{H}$  NMR (400 MHz,  $\text{MeOH-}d_4$ ):  $\delta$  = 7.97 (br. d,  $J$  = 8.3 Hz, 2H), 7.74 (br. d,  $J$  = 8.3 Hz, 2H), 5.79 (d,  $J$  = 2.3 Hz, 1H), 5.32 (d,  $J$  = 18.1 Hz, 1H), 5.24 (d,  $J$  = 18.1 Hz, 1H), 5.15 (q,  $J$  = 6.9 Hz, 1H), 5.08 (d,  $J$  = 2.3 Hz, 1H), 1.64 (d,  $J$  = 6.9 Hz, 3H).  $^{13}\text{C}$  NMR (101 MHz,  $\text{MeOH-}d_4$ ):  $\delta$  = 192.55, 167.37, 161.36, 135.25, 134.98, 133.51, 131.13, 130.35, 107.88, 76.01, 51.27, 18.90. HRMS (ESI-TOF, neg.):  $m/z$  calcd for  $\text{C}_{14}\text{H}_{11}\text{BrNO}_4$  [ $\text{M-H}$ ] $^-$  335.9866, found 335.9870.

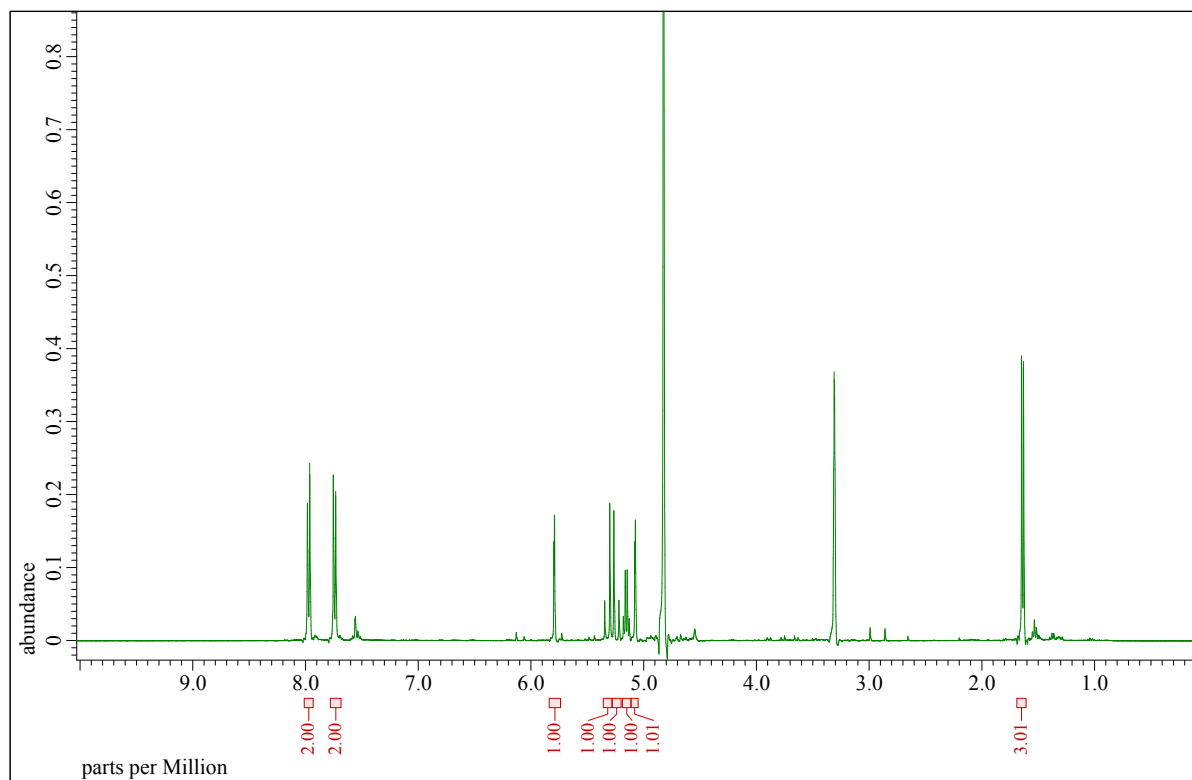

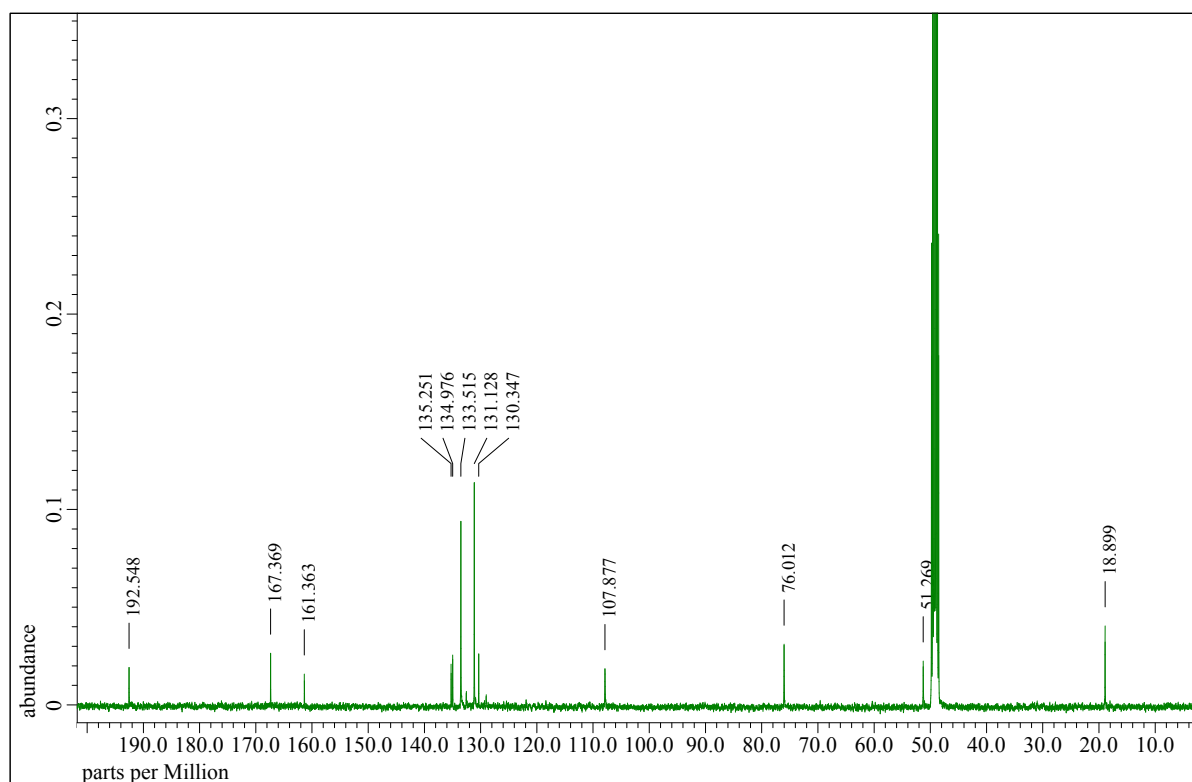

**4-(2-(4-bromophenyl)-2-oxoethyl)-3-methylene-6-phenyl-morpholine-2,5-dione 5{3,3}**

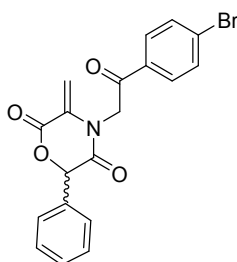

SFC: Mixture of enantiomers in ratio 50:50 (*R*:*S*). Creme amorphous solid, 9.8 mg (18%, 0.025 mmol). Cleaved from 359 mg of resin **2{3,2}** (0.37 mmol/g, 0.132 mmol of substrate). HPLC purity 99%.  $^1\text{H}$  NMR (500 MHz,  $\text{MeCN-}d_3$ ):  $\delta$  = 7.93 (d,  $J$  = 8.9 Hz, 2H), 7.73 (d,  $J$  = 8.9 Hz, 2H), 7.46-7.53 (m, 5H), 6.04 (s, 1H), 5.81 (d,  $J$  = 2.6 Hz, 1H), 5.40 (d,  $J$  = 18.0 Hz, 1H), 5.07 (d,  $J$  = 2.6 Hz, 1H), 5.03 (d,  $J$  = 18.0 Hz, 1H).  $^{13}\text{C}$  NMR (126 MHz,  $\text{MeCN-}d_3$ ):  $\delta$  = 192.14, 164.25, 160.16, 136.26, 134.50, 134.48, 133.11, 130.96, 130.59, 130.02, 129.68, 128.29, 108.46, 80.62, 51.46. HRMS (ESI-TOF, pos.):  $m/z$  calcd for  $\text{C}_{19}\text{H}_{15}\text{BrNO}_4$   $[\text{M}+\text{H}]^+$  400.0179, found 400.0179.

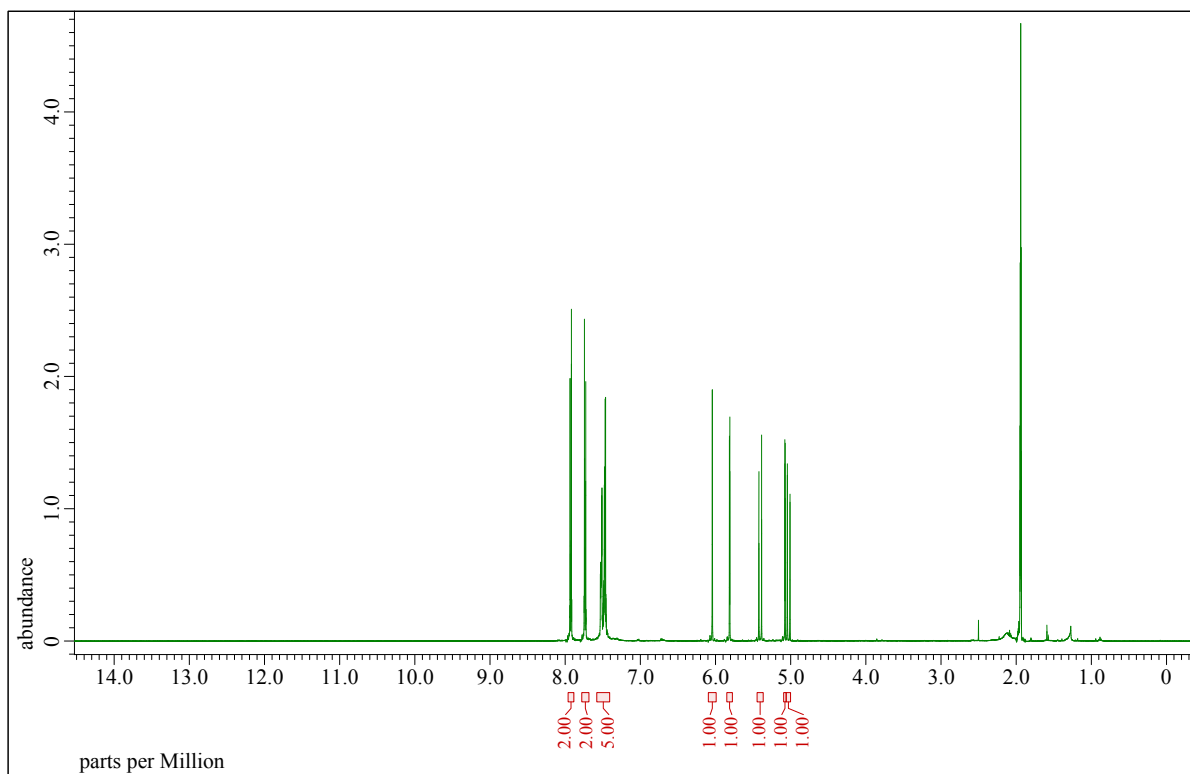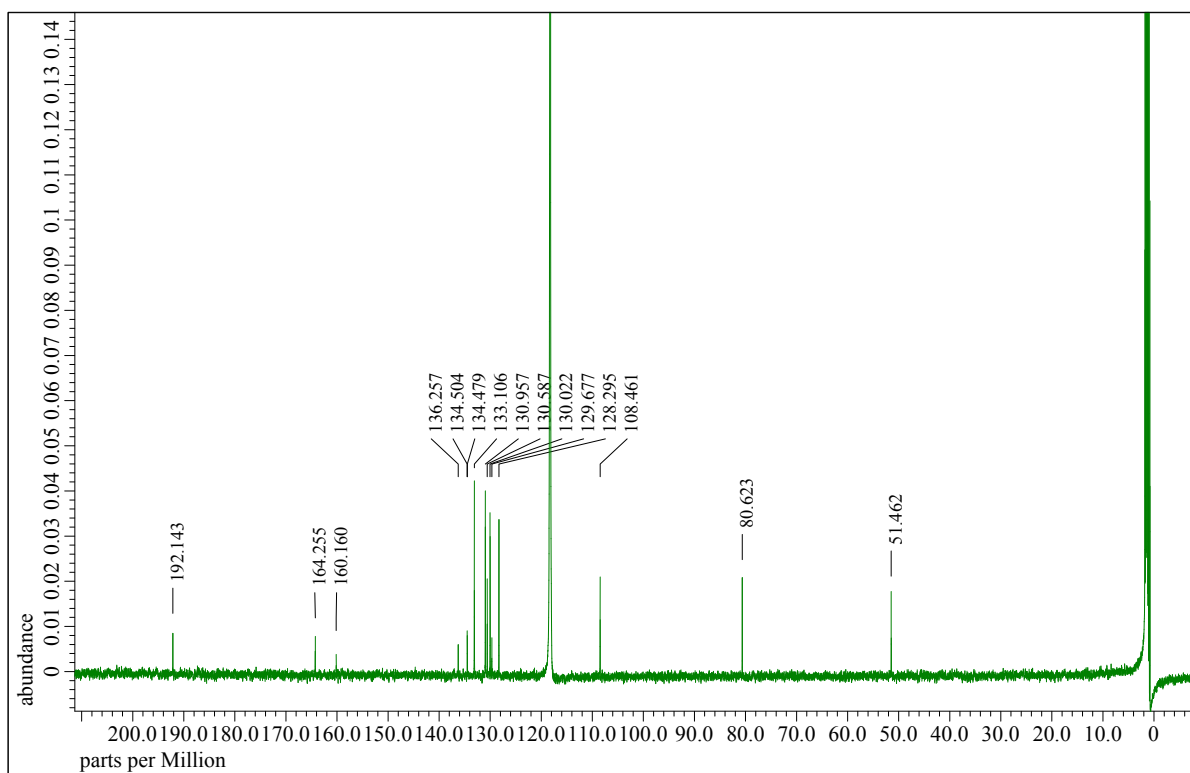

**(7R,9aS)-7-phenyltetrahydro-1H-[1,4]oxazino[3,4-c][1,4]oxazine-1,4(3H)-dione 6{1,1}**

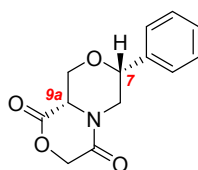

Crepe amorphous solid, 24.6 mg (54%, 0.010 mmol). Cleaved from 471 mg of resin **2{1,1}** (0.39 mmol/g, 0.184 mmol of substrate), prepared to reduce the crude compound **4{1,1}**. HPLC purity 98%.  $^1\text{H}$  NMR (500 MHz,  $\text{MeOH-}d_4$ ):  $\delta$  = 7.28-7.41 (m, 5H), 4.92 (d,  $J$  = 16.3 Hz, 1H), 4.80 (d,  $J$  = 16.3 Hz, 1H), 4.56 (dd,  $J$  = 11.5, 2.9 Hz, 1H), 4.53 (dd,  $J$  = 10.8, 4.4 Hz, 1H), 4.41 (dd,  $J$  = 11.5, 4.4 Hz, 1H), 4.39 (dd,  $J$  = 13.5, 2.9 Hz, 1H), 3.85 (dd,  $J$  = 11.5, 10.8 Hz, 1H, overlap with methyl of  $\text{MeOH-}d_4$ ), 2.80 (dd,  $J$  = 13.5, 11.5 Hz, 1H).  $^{13}\text{C}$  NMR (126 MHz,  $\text{MeOH-}d_4$ ):  $\delta$  = 165.89, 165.26, 139.87, 129.80, 129.71, 127.27, 78.61, 69.24, 68.42, 54.57, 47.79. HRMS (ESI-TOF, pos.):  $m/z$  calcd for  $\text{C}_{13}\text{H}_{14}\text{NO}_4$   $[\text{M}+\text{H}]^+$  248.0917, found 248.0918.

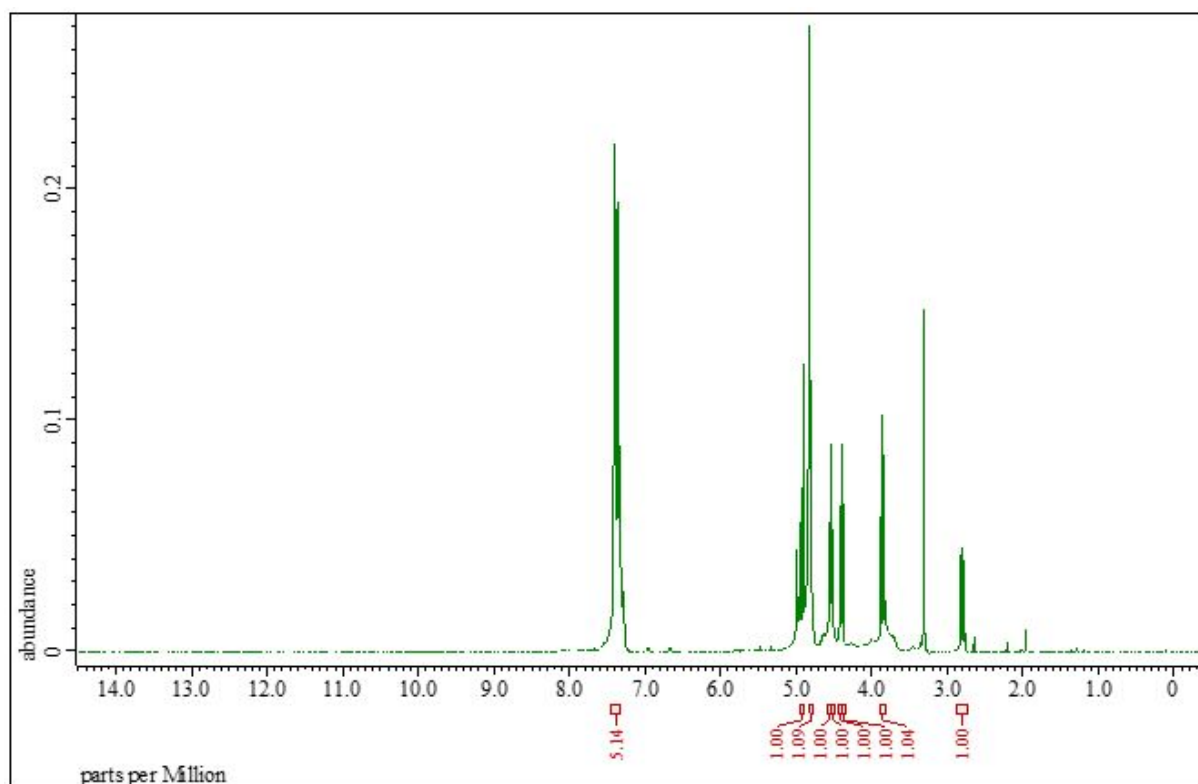

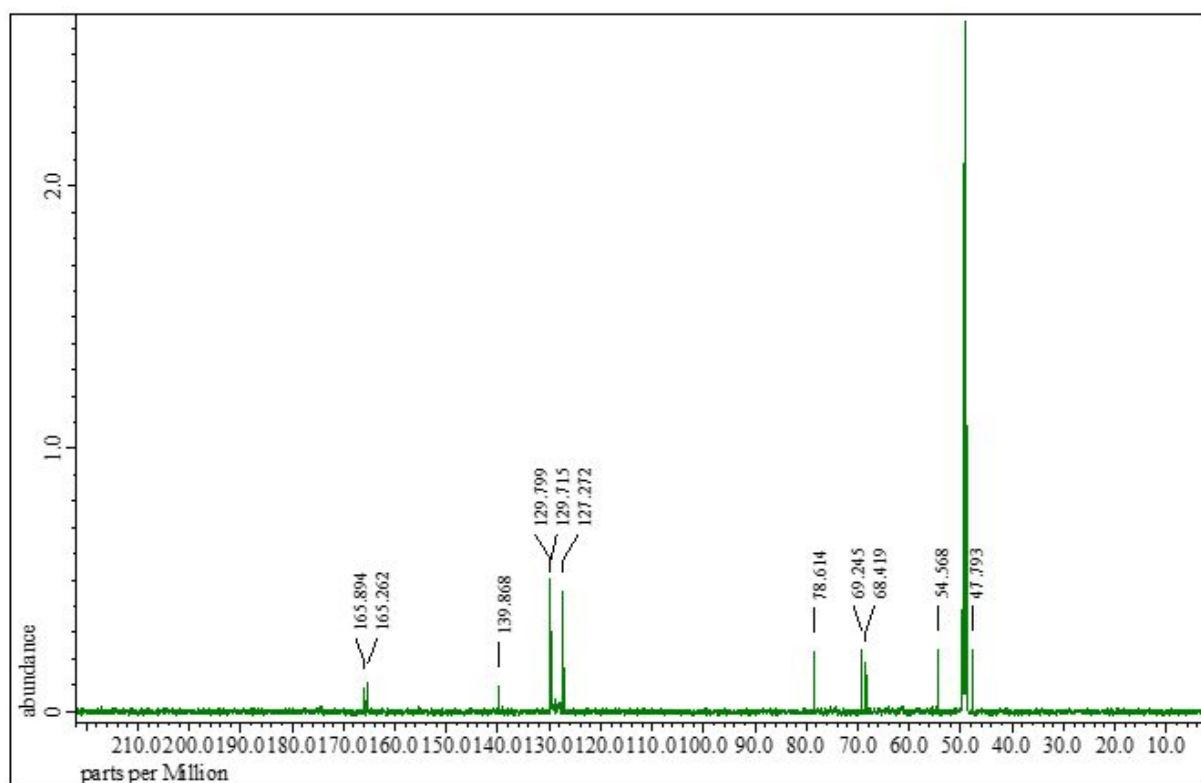

### 3-methyl-4-(2-oxo-2-phenylethyl)morpholine-2,5-dione 7{1,1}

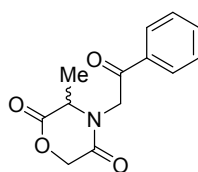

SFC: Mixture of enantiomers in ratio 80:20 (*R*:*S*). Yellow-brown amorphous solid, 3.1 mg (12%, 0.013 mmol). Cleaved from 279 mg of resin **2{1,1}** (0.37 mmol/g, 0.103 mmol of substrate), prepared to reduce the compound **5{1,1}**. HPLC purity 97%.  $^1\text{H}$  NMR (400 MHz,  $\text{MeOH-}d_4$ ):  $\delta$  = 7.62-7.66 (m, 2H), 7.33-7.39 (m, 3H), 5.08 (q,  $J$  = 7.5 Hz, 1H), 4.36-4.42 (m, 2H), 3.64 (d,  $J$  = 12.7 Hz, 1H), 3.46 (d,  $J$  = 12.7 Hz, 1H), 1.36 (td,  $J$  = 10.5, 1.9 Hz, 3H). HRMS (ESI-TOF, pos.):  $m/z$  calcd for  $\text{C}_{13}\text{H}_{14}\text{NO}_4$   $[\text{M}+\text{H}]^+$  248.0917, found 248.0918.

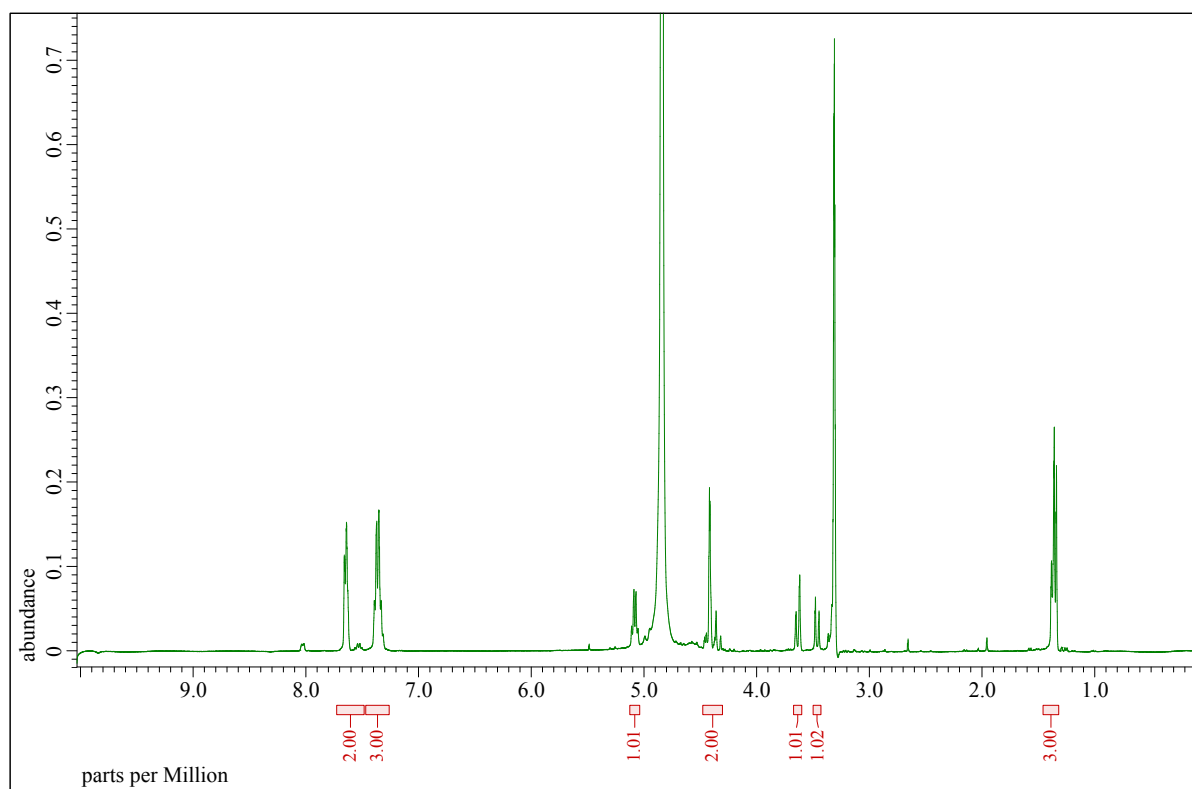

Supplement: Supplementary file 1 [file 14116403]
